# Supplementary material for: Impact of Nb vacancies and p-type doping of the NbCoSn–NbCoSb half-Heusler thermoelectrics
Source: Royal Society of Chemistry journal article supplement (doi:10.1039/c7cp07521a), 2018-01-01
Supplement: c7cp07521a1.pdf [file c7cp07521a1.pdf]

Supplementary information for:

## Impact of Nb vacancies and p-type doping of the NbCoSn-NbCoSb half-Heusler thermoelectrics

Daniella A. Ferluccio,<sup>a</sup> Ronald I. Smith<sup>b</sup>, Jim. Buckman<sup>c</sup> and Jan-Willem G. Bos<sup>a\*</sup>

<sup>a</sup> *Institute of Chemical Sciences and Centre for Advanced Energy Storage and Recovery, School of Engineering and Physical Sciences, Heriot-Watt University, Edinburgh, EH14 4AS, UK.*

<sup>b</sup> *ISIS Facility, Rutherford Appleton Laboratory, Harwell Oxford, Didcot, OX11 0QX, UK.*

<sup>c</sup> *Institute of Petroleum Engineering, Heriot-Watt University, Edinburgh, EH14 4AS, UK.*

\* [j.w.g.bos@hw.ac.uk](mailto:j.w.g.bos@hw.ac.uk)

**Table S1:** Lattice parameters (Å) from x-ray powder diffraction for all NbCoSn based compositions synthesised using Ta foil.

| Composition                                                | <i>a</i> (Å)                                       |
|------------------------------------------------------------|----------------------------------------------------|
| NbCoSn                                                     | 5.9500(5)                                          |
| NbCo <sub>1.05</sub> Sn                                    | 5.9506(4)                                          |
| Nb <sub>0.8</sub> Ti <sub>0.2</sub> Co <sub>1.05</sub> Sn  | 5.9660(5)                                          |
| Nb <sub>0.8</sub> Zr <sub>0.2</sub> Co <sub>1.05</sub> Sn  | HH 1 5.9970(2)<br>HH 2 5.9605(3)<br>HH 3 5.9822(3) |
| NbCo <sub>1.05</sub> Sn <sub>0.75</sub> Sb <sub>0.25</sub> | 5.9438(1)                                          |
| NbCo <sub>1.05</sub> Sn <sub>0.5</sub> Sb <sub>0.5</sub>   | 5.9429(1)                                          |
| NbCoSb                                                     | 5.9004(1)                                          |
| NbCo <sub>1.05</sub> Sb                                    | 5.9028(1)                                          |

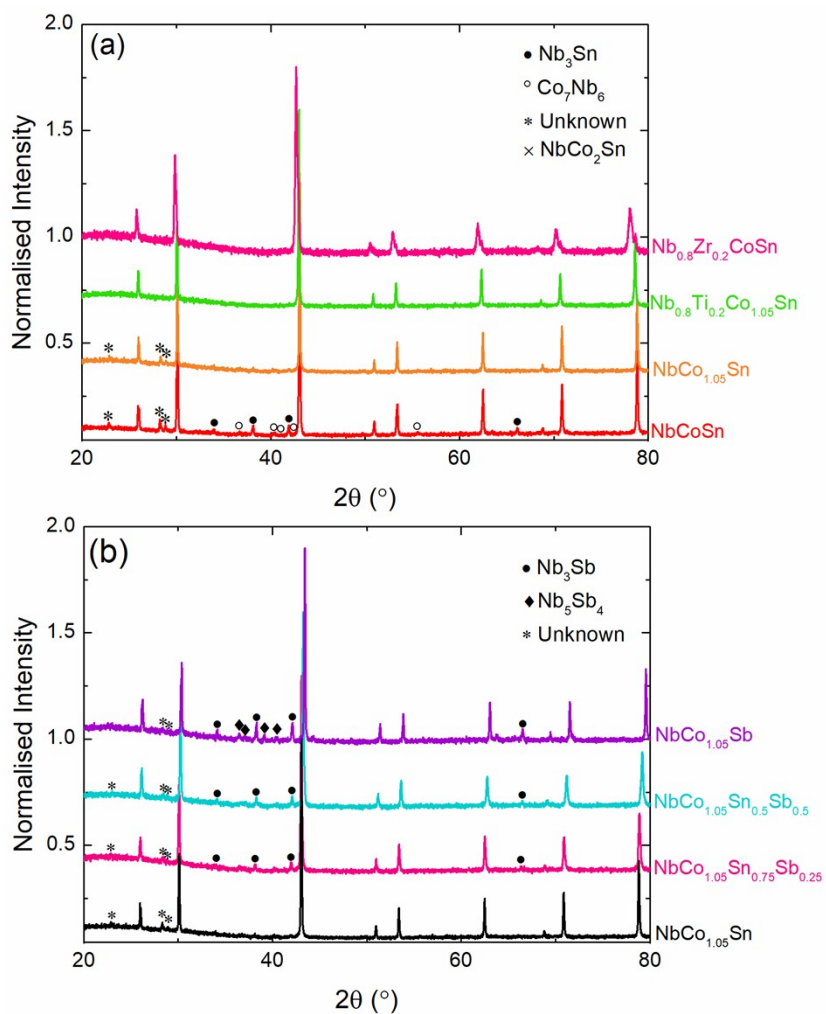

**Figure S1:** X-ray powder diffraction data for compositions annealed using Ta foil **(a)**  $\text{NbCo}_{1+y}\text{Sn}$  ( $y = 0, 0.05$ ),  $\text{Nb}_{0.8}\text{Ti}_{0.2}\text{Co}_{1.05}\text{Sn}$ ,  $\text{Nb}_{0.8}\text{Zr}_{0.2}\text{CoSn}$  and **(b)**  $\text{NbCo}_{1.05}\text{Sn}_{1-z}\text{Sb}_z$  ( $0 \leq z \leq 1$ ), after hot pressing.

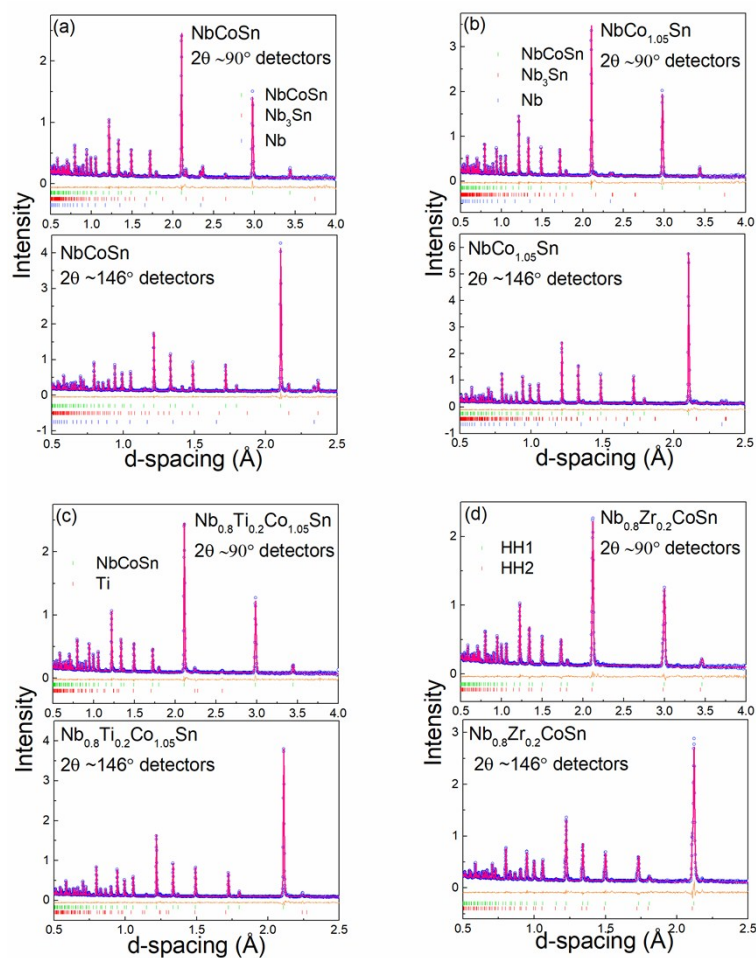

**Figure S2:** Fitted powder neutron diffraction profiles for **(a-b)**  $\text{NbCo}_{1+y}\text{Sn}$  ( $y = 0, 0.05$ ), **(c)**  $\text{Nb}_{0.8}\text{Ti}_{0.2}\text{CoSn}$  and **(d)**  $\text{Nb}_{0.8}\text{Zr}_{0.2}\text{CoSn}$ . Blue circles are observed data, red lines are calculated profile, orange lines are difference profiles (obs-calc). Vertical lines indicate Bragg reflection positions (phases indicated in figures).

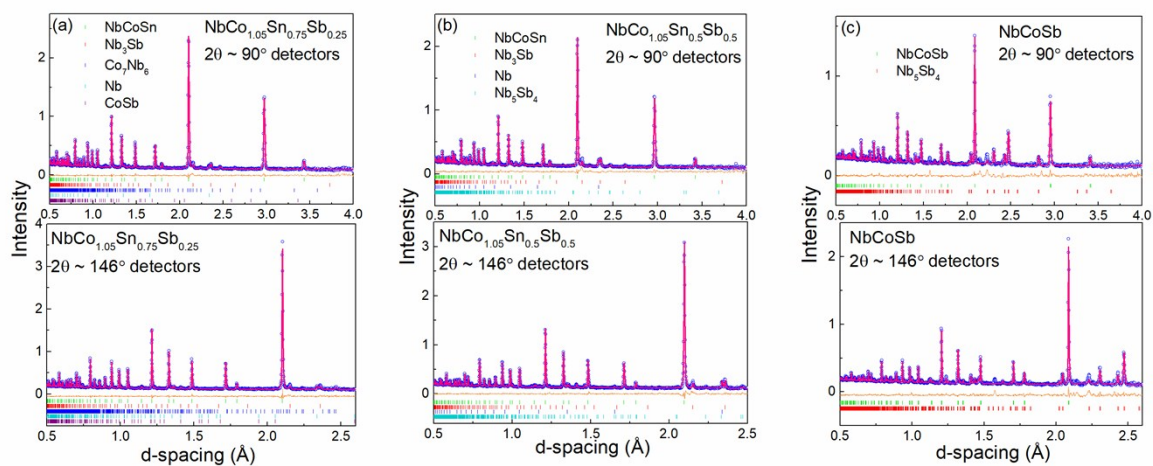

**Figure S3** Fitted powder neutron diffraction profiles for **(a-c)**  $\text{NbCo}_{1.05}\text{Sn}_{1-z}\text{Sb}_z$  ( $z = 0.25, 0.5, 1$ ). Blue circles are observed data, red lines are calculated profile, orange lines are difference profiles (obs-calc). Vertical lines indicate Bragg reflection positions (phases indicated in figures).
